# Supplementary material for: deepTools: a flexible platform for exploring deep-sequencing data
Source: Oxford University Press journal article supplement (doi:10.1093/nar/gku365), 2014-05-05
Supplement: gku365_Supplementary_Data.zip [file gku365_Supplementary_Data.zip]

Supplementary table 1. Comparison of available software similar to deepTools

| Tool suite | web-server | if there is a webserver, can it be used without login? | Galaxy implementation | Parallelization | QC of BAM files (beyond FASTQC) | processing and normalization of BAM files | generates customizable images | allows for export of data | tutorial                  | Software          | stand alone local installation | url                                                                                         |
|------------|------------|--------------------------------------------------------|-----------------------|-----------------|---------------------------------|-------------------------------------------|-------------------------------|---------------------------|---------------------------|-------------------|--------------------------------|---------------------------------------------------------------------------------------------|
| deepTools  | yes        | yes                                                    | yes                   | yes             | yes                             | yes just                                  | yes                           | yes                       | yes website not reachable | Galaxy & python   | yes                            | <a href="http://deeptools.ie-freiburg.mpg.de">http://deeptools.ie-freiburg.mpg.de</a>       |
| seqminer   | no         | --                                                     | no                    | yes             | no                              | normalization                             | yes                           | yes                       | yes                       | Java              | yes                            | <a href="http://bips.u-strasbg.fr/seqminer/">http://bips.u-strasbg.fr/seqminer/</a>         |
| spark      | yes        | no                                                     | no                    | yes             | no                              | no                                        | no                            | yes                       | yes                       | Java              | yes                            | <a href="http://www.sparkinsight.org/">http://www.sparkinsight.org/</a>                     |
| CISTROME   | yes        | no                                                     | yes                   | no              | no                              | no                                        | limited                       | yes                       | Galaxy page               | Galaxy, R, python | difficult                      | <a href="http://genomebiology.com/2011/12/8/r83">http://genomebiology.com/2011/12/8/r83</a> |
| HOMER      | no         | --                                                     | no                    | no              | yes                             | yes                                       | no                            | yes                       | yes                       | perl              | yes                            | <a href="http://homer.salk.edu/homer/chipseq/">http://homer.salk.edu/homer/chipseq/</a>     |
| NGS plot   | no         | --                                                     | yes                   | --              | no                              | no                                        | limited                       | images                    | no                        | R, python, perl   | yes                            | <a href="https://code.google.com/p/ngsplot/">https://code.google.com/p/ngsplot/</a>         |
| GeneProf   | yes        | not for analysis                                       | no                    | --              | no                              | yes                                       | yes                           | yes                       | yes                       | Java, R, LaTeX    | no                             | <a href="http://www.geneprof.org/">http://www.geneprof.org/</a>                             |
