# Supplementary material for: deepTools: a flexible platform for exploring deep-sequencing data
Source: Oxford University Press journal article supplement (doi:10.1093/nar/gku365), 2014-05-05
Supplement: gku365_Supplementary_Data.zip [file gku365_Supplementary_Data.zip]

Supplemental table 2. Performance details of the deeptools Galaxy server.

|                                    |                 |
|------------------------------------|-----------------|
| <b>Hardware</b>                    |                 |
| processors                         | 16              |
| RAM                                | 141 GB          |
| storage (directly attached)        | 2 TB            |
| <b>Galaxy Performance Settings</b> |                 |
| concurrent users                   | unlimited       |
| CPU cores per job                  | 6               |
| concurrent jobs per user           | 1               |
| concurrent jobs                    | 2               |
| queueing system                    | Galaxy built-in |
| <b>Exemplary run time</b>          |                 |
| BAM file                           | 170 M reads     |
| BED file                           | 10000 regions   |
| bamCoverage                        | 10 minutes      |
| computeMatrix                      | 1 minute        |
